# Supplementary material for: Associations between endothelial progenitor cells, clinical characteristics and coronary restenosis in patients undergoing percutaneous coronary artery intervention
Source: PubMed Central journal article supplement (PMC5941758; doi:10.1186/s13104-018-3401-y), 2018-05-08
Supplement: 13104_2018_3401_MOESM4_ESM.pdf [file 13104_2018_3401_MOESM4_ESM.pdf]

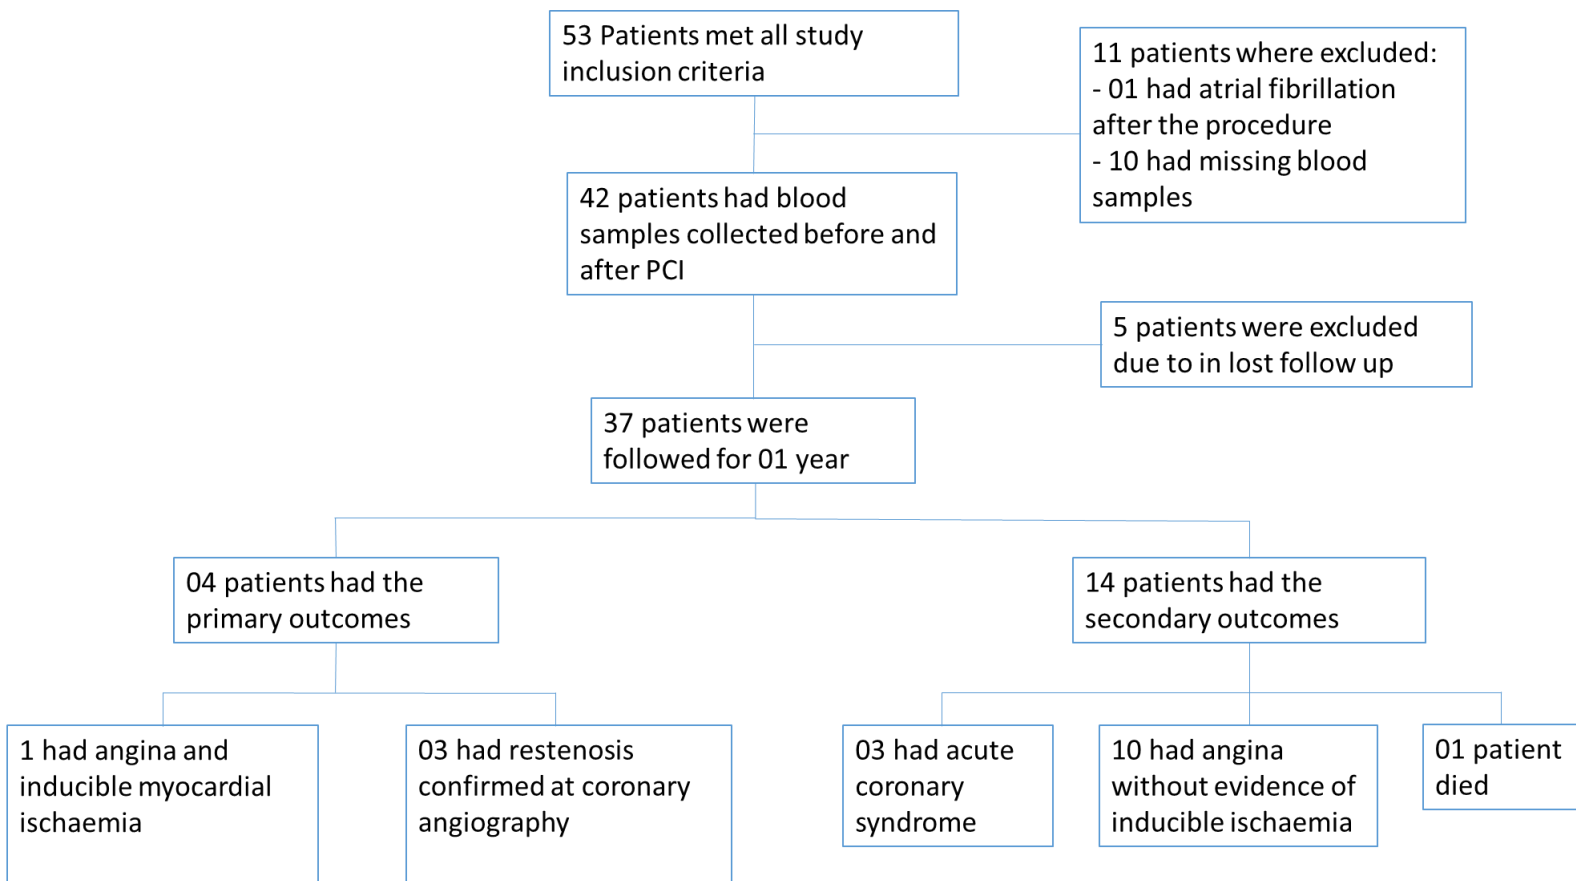

Figure S2. Flowchart depicting patient outcomes
